# Supplementary material for: Increased mitochondrial and lipid metabolism is a conserved effect of Insulin/PI3K pathway downregulation in adipose tissue
Source: PubMed Central journal article supplement (PMC7042323; doi:10.1038/s41598-020-60210-3), 2020-02-25

**Increased mitochondrial and lipid metabolism is a conserved effect of Insulin/PI3K pathway downregulation in adipose tissue**

Lucia Bettedi, Anqi Yan, Eugene Schuster, Nazif Alic and Lazaros C. Foukas

Supplementary Information

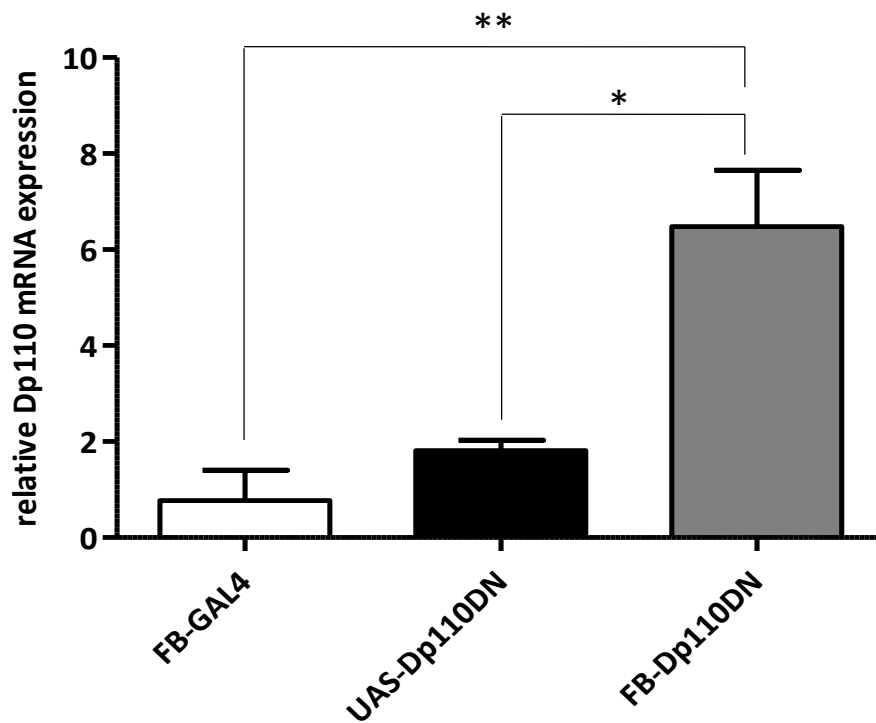

**Supplementary Fig. 1: Expression of Dp110DN transgene in fat bodies of FB-Dp110DN flies.**

RNA was extracted from freshly dissected fat body homogenates of Dp110DN and control flies and expression of Dp110 was assessed by Q-PCR.

Data are presented as mean ± sem from three (n=3) biological replicates (each sample derived from 5 pooled fat bodies). Statistical comparison was performed with one way ANOVA with Bonferroni's multiple correction test. \* p<0.05, \*\* p<0.01.

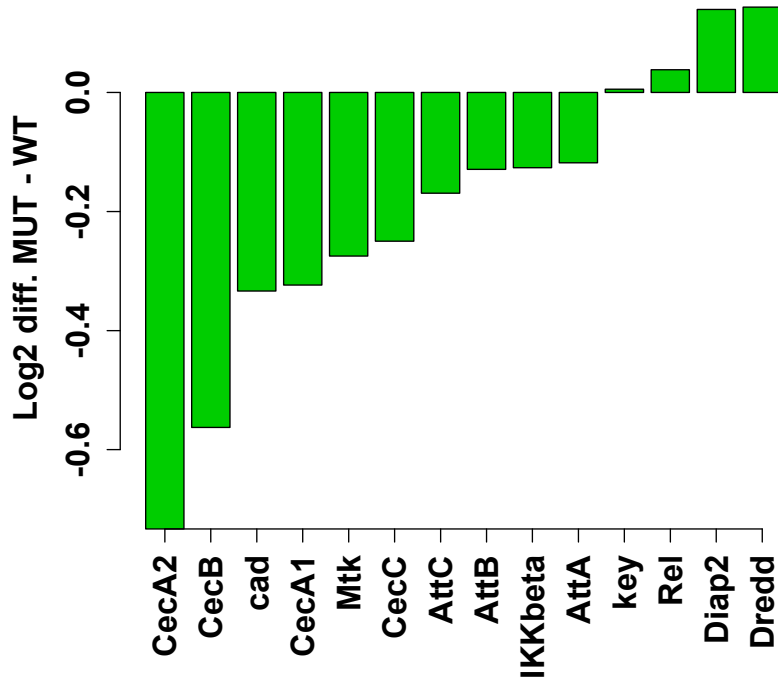

**Supplementary Fig. 2: Reduced antimicrobial peptide gene expression in Dp110-DN fly fat body.**

Antimicrobial humoral response (GO:0019730) shows a significant shift for down regulation in the mutant flies ( $p = 0.004$ , Mann-Whitney test on log2 diff).

Source blots for Fig. 3B-C

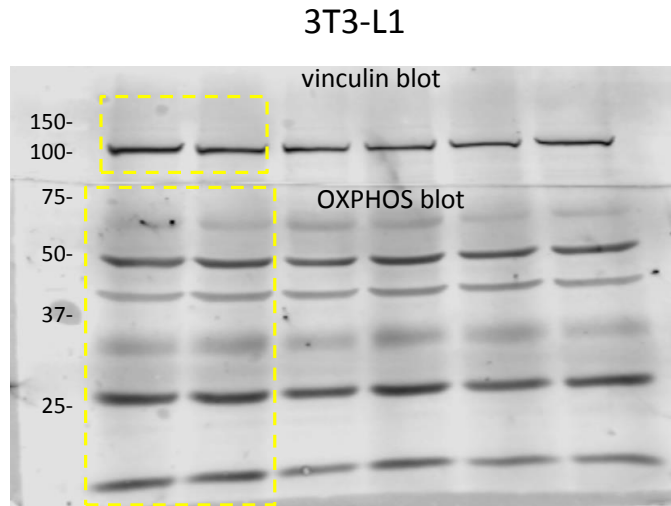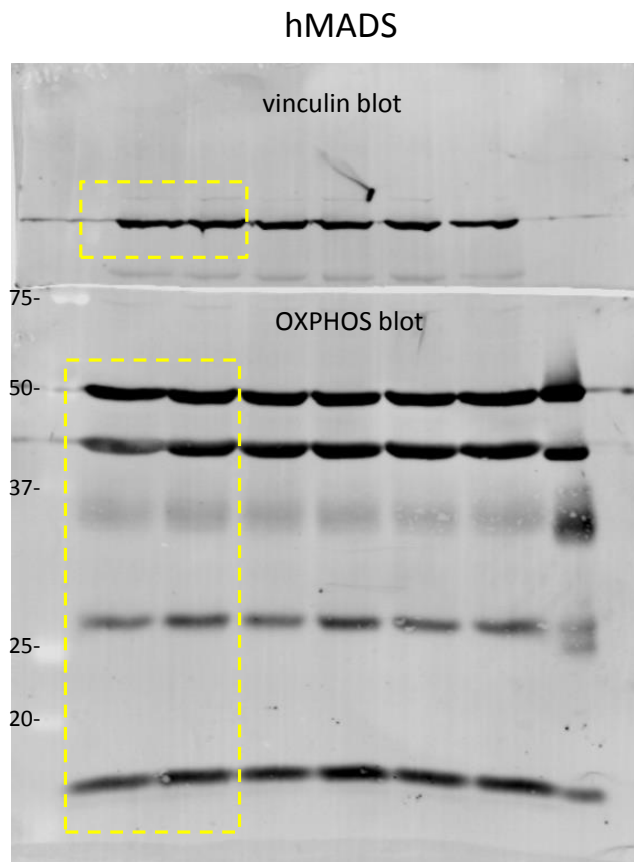

Source blots for Fig. 3D

PGC1 $\alpha$  blot

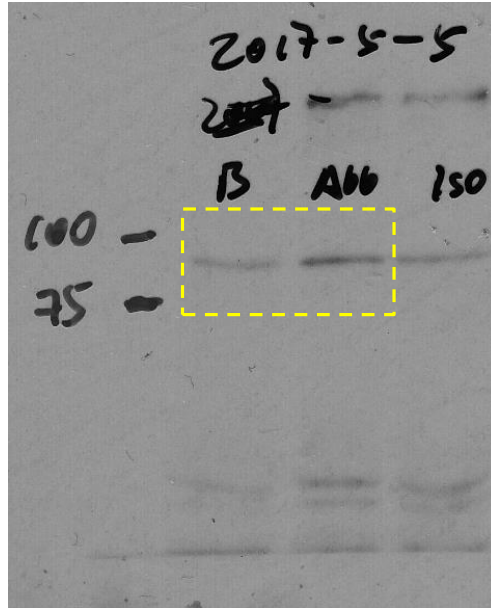

vinculin blot

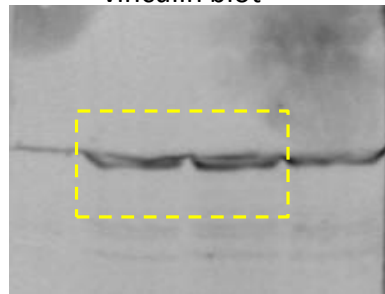

Source blots for Fig. 4C

vinculin blot

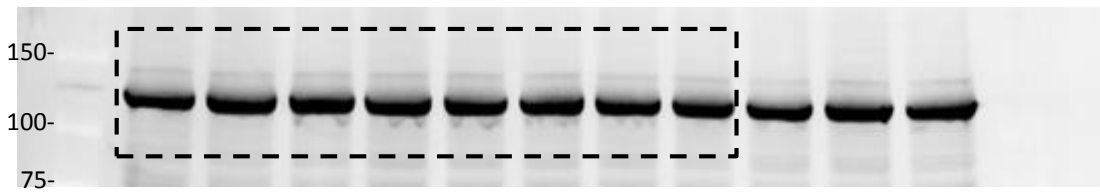

LC3B blot

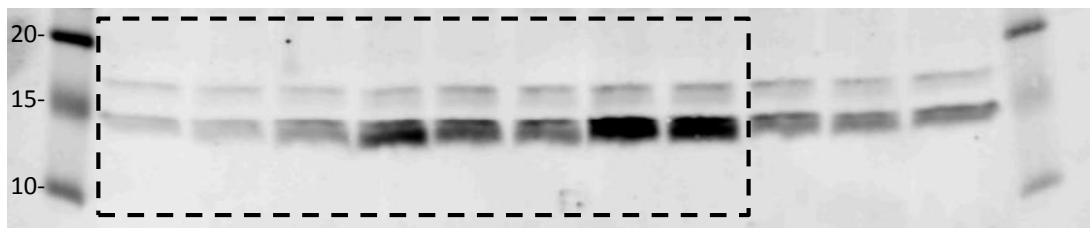

Supplement: 41598_2020_60210_MOESM1_ESM.pdf [file 41598_2020_60210_MOESM1_ESM.pdf]
